# Supplementary material for: Metabolomic Analysis, Combined with Enzymatic and Transcriptome Assays, to Reveal the Browning Resistance Mechanism of Fresh-Cut Eggplant
Source: MDPI journal article supplement (doi:10.3390/foods11081174), 2022-04-18
Supplement: s1 [file s1]

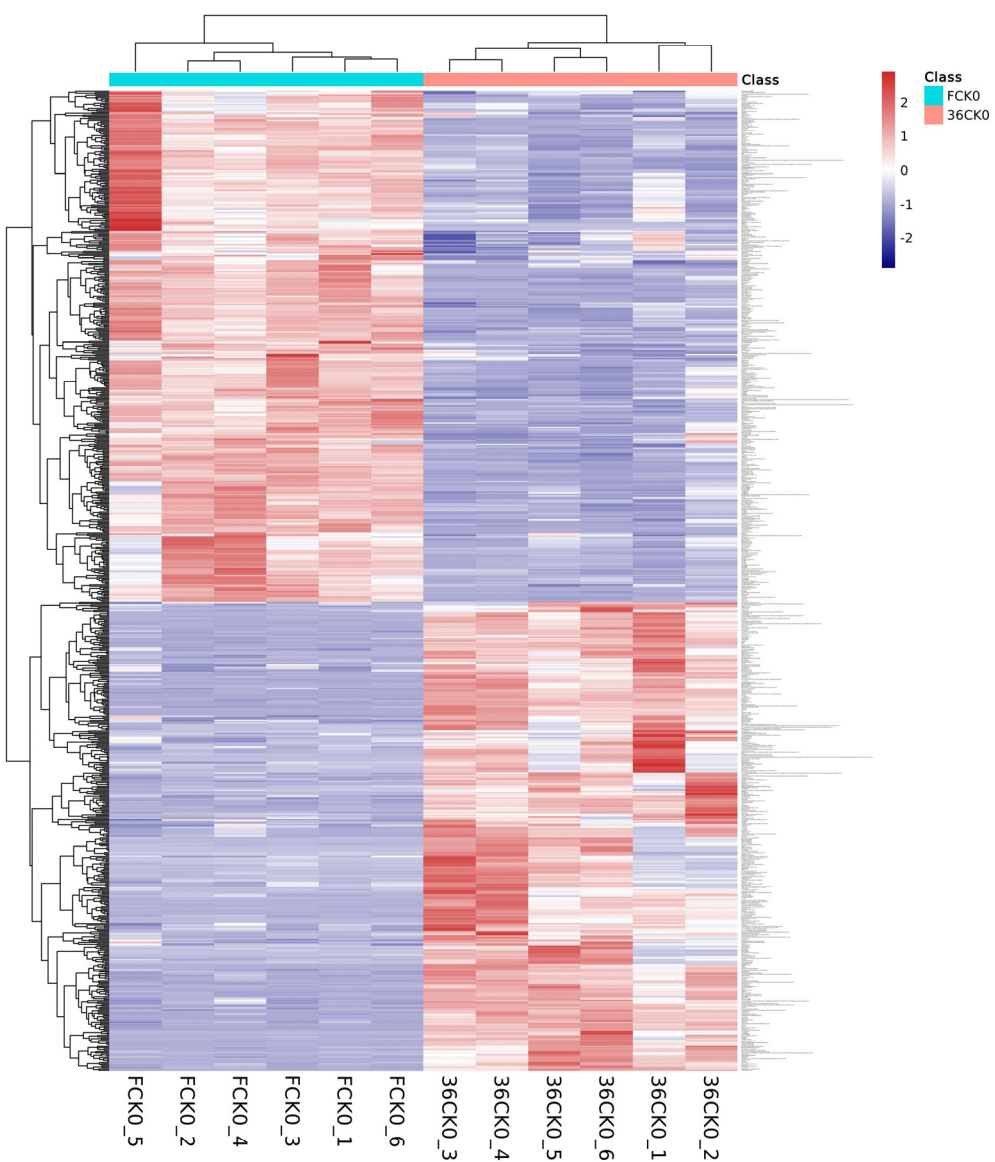

(a)

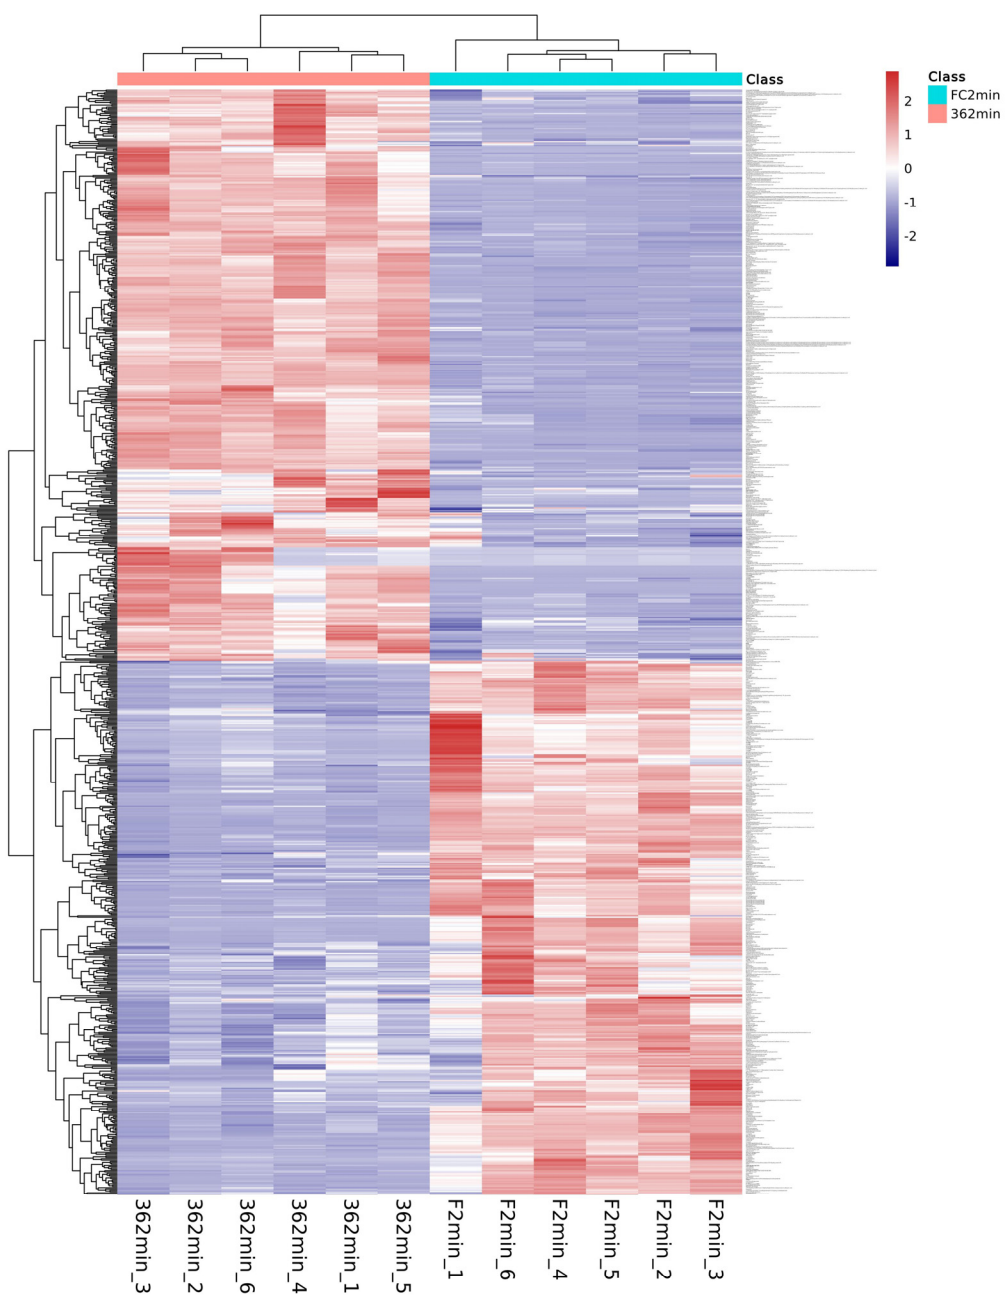

(b)

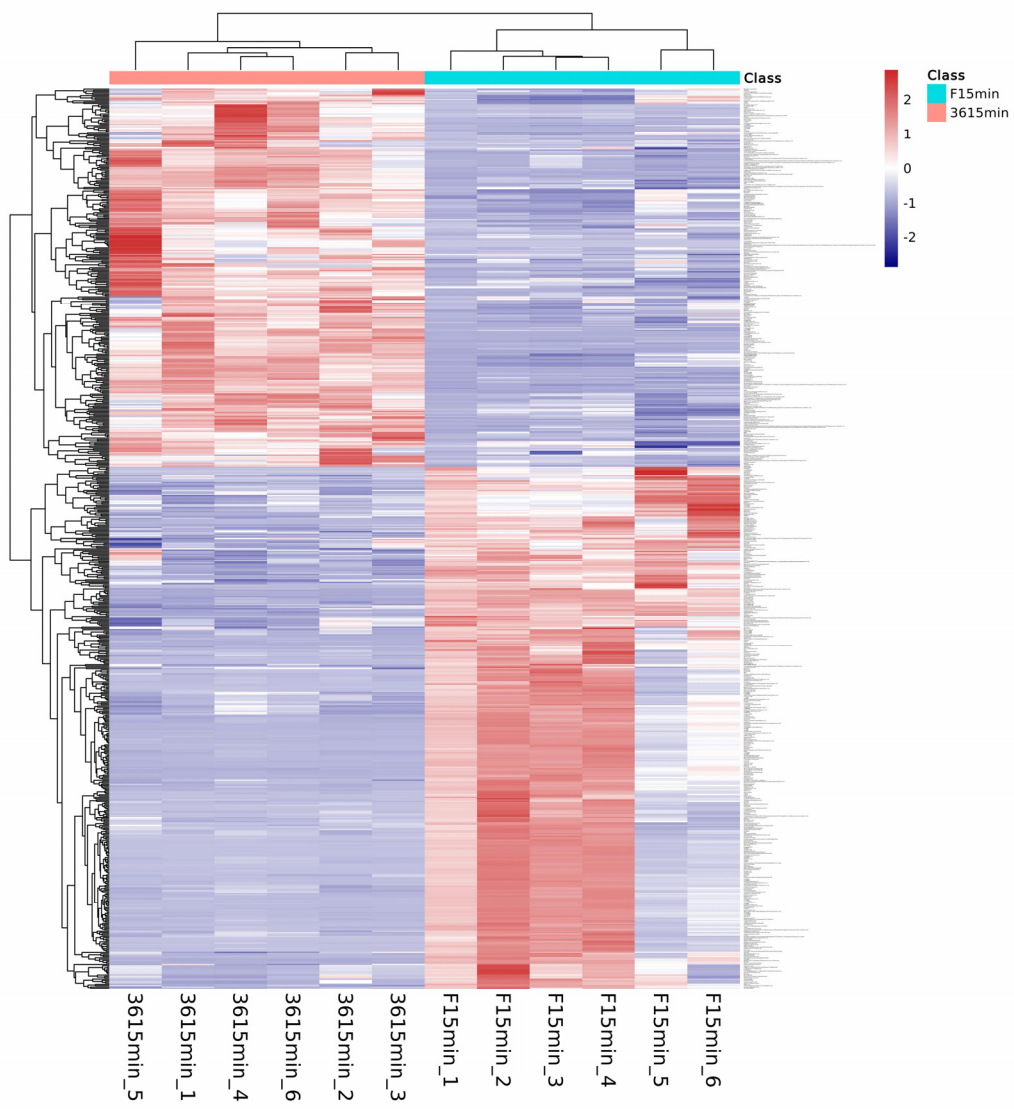

(c)

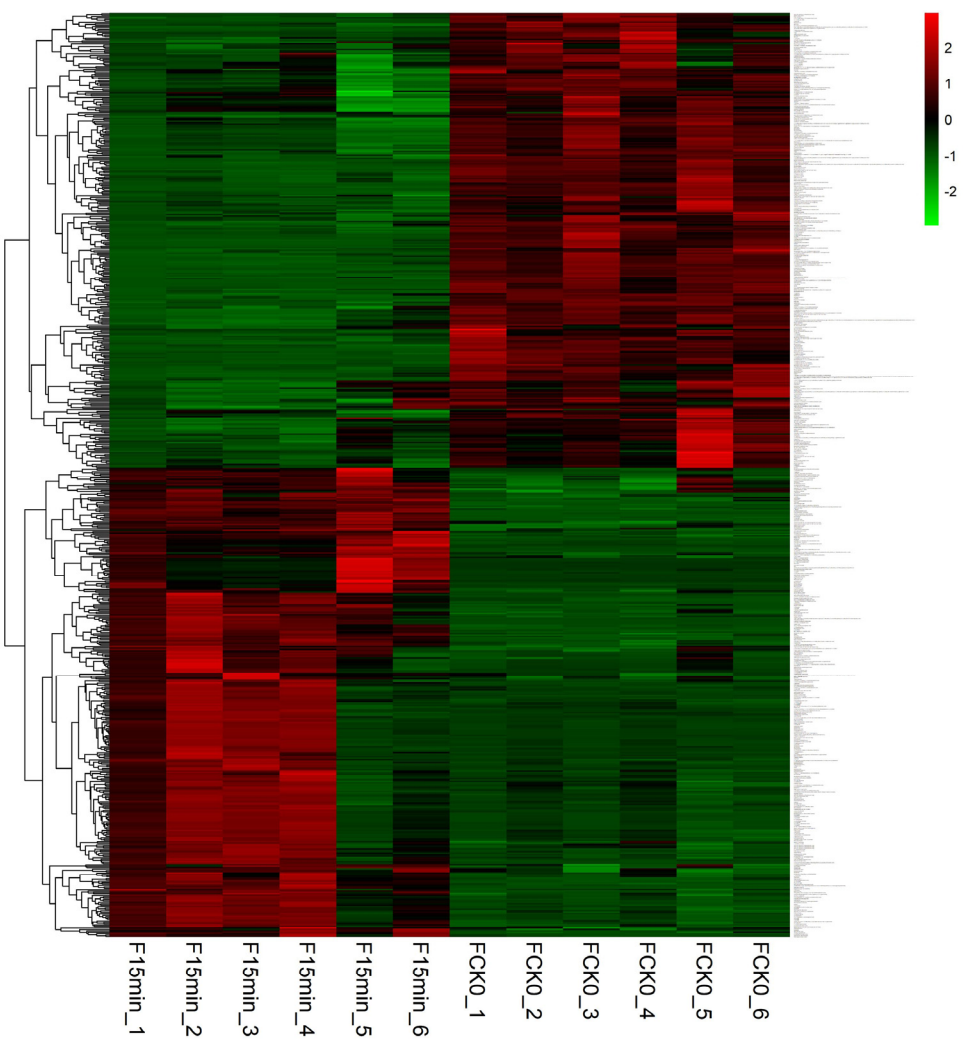

(d)

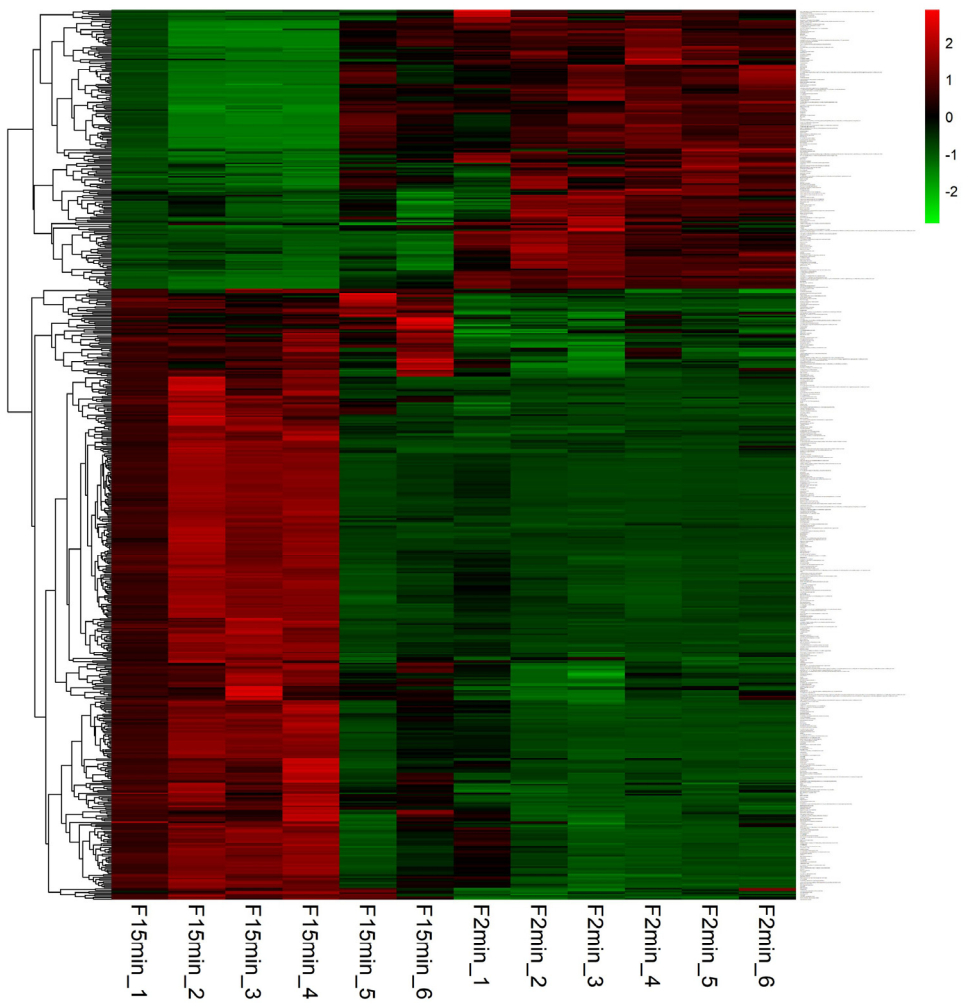

(e)

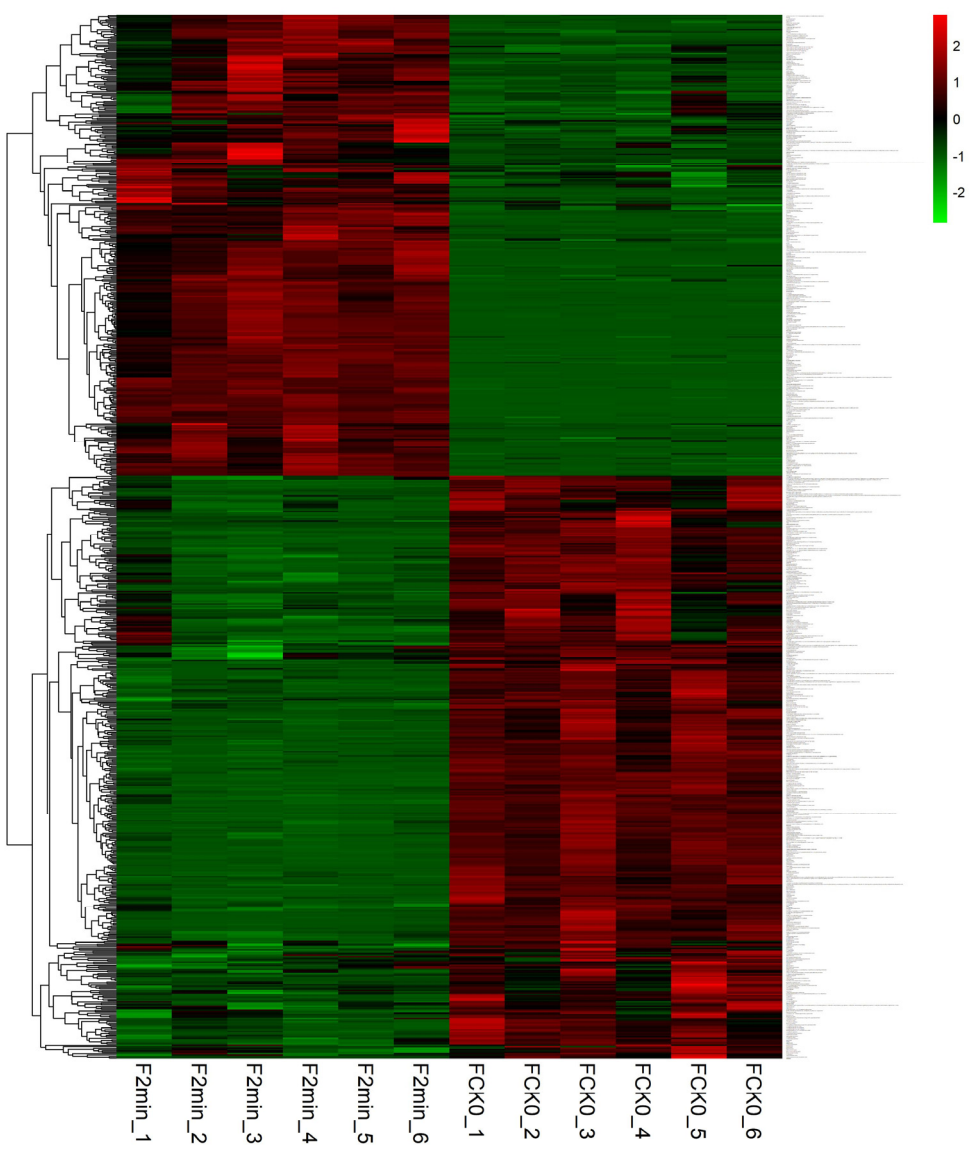

(f)

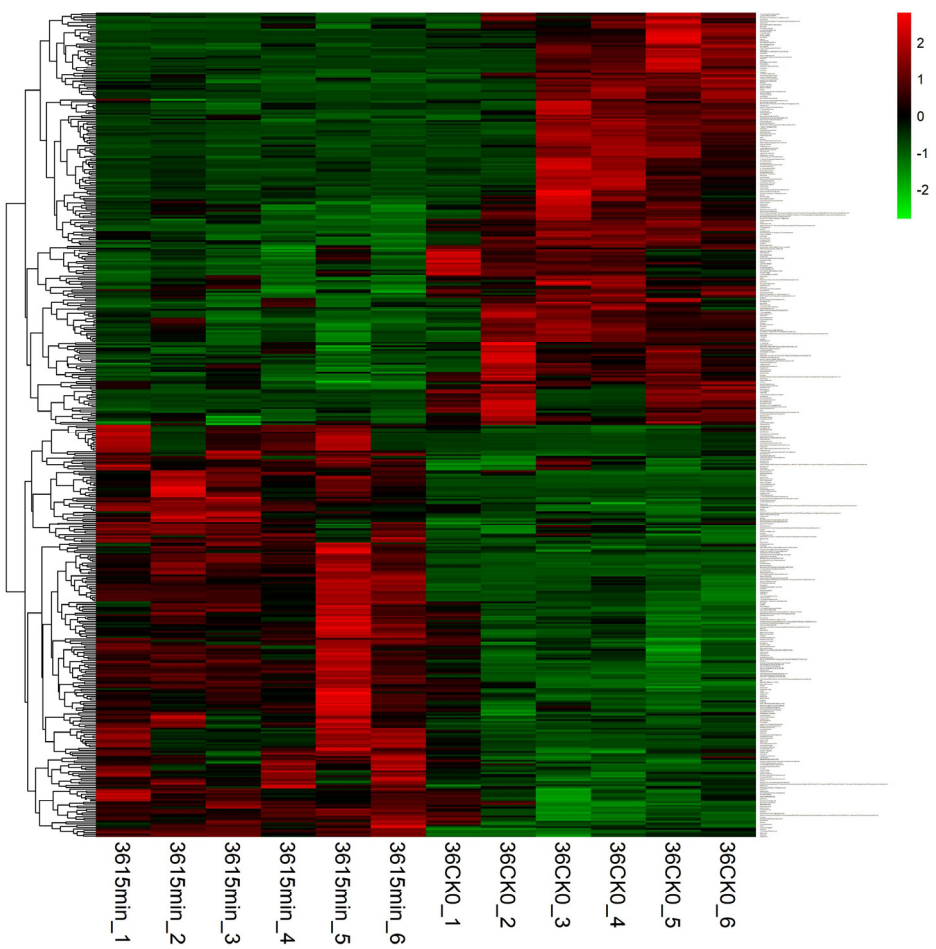

(g)

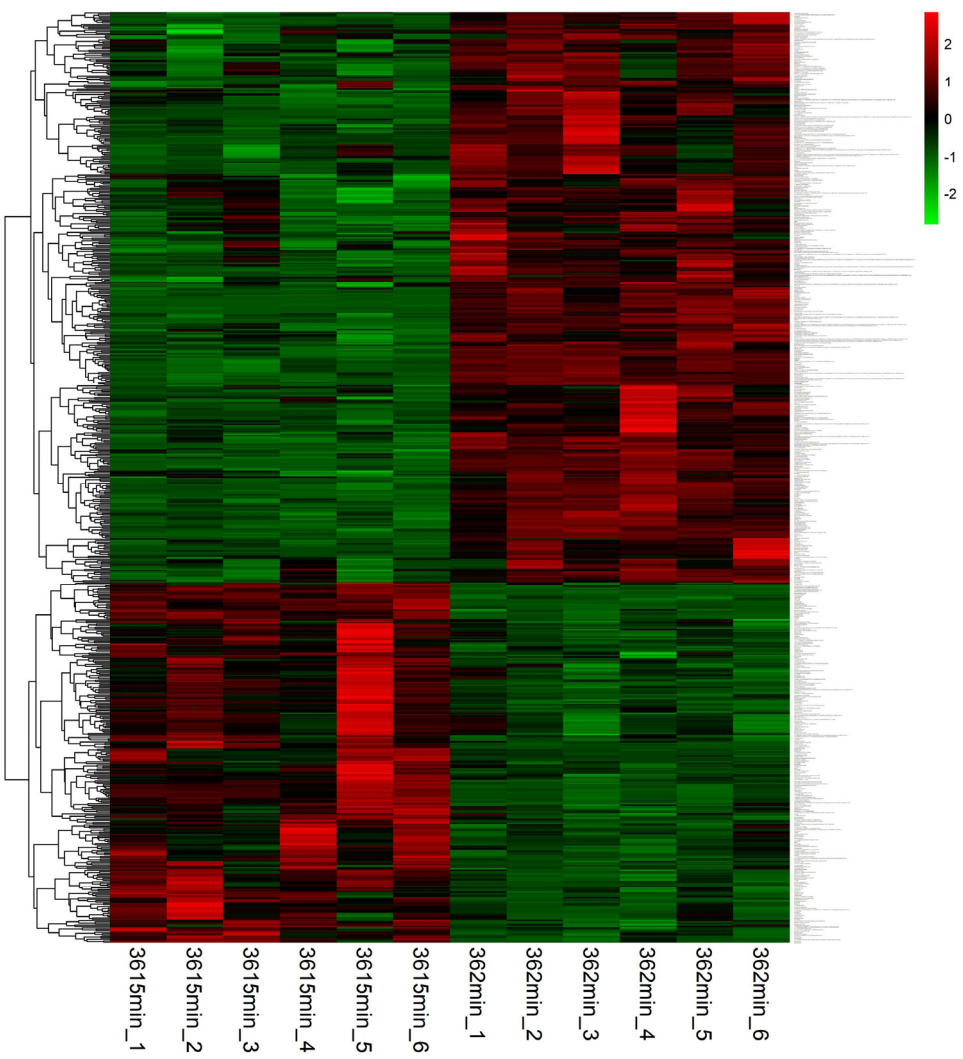

(h)



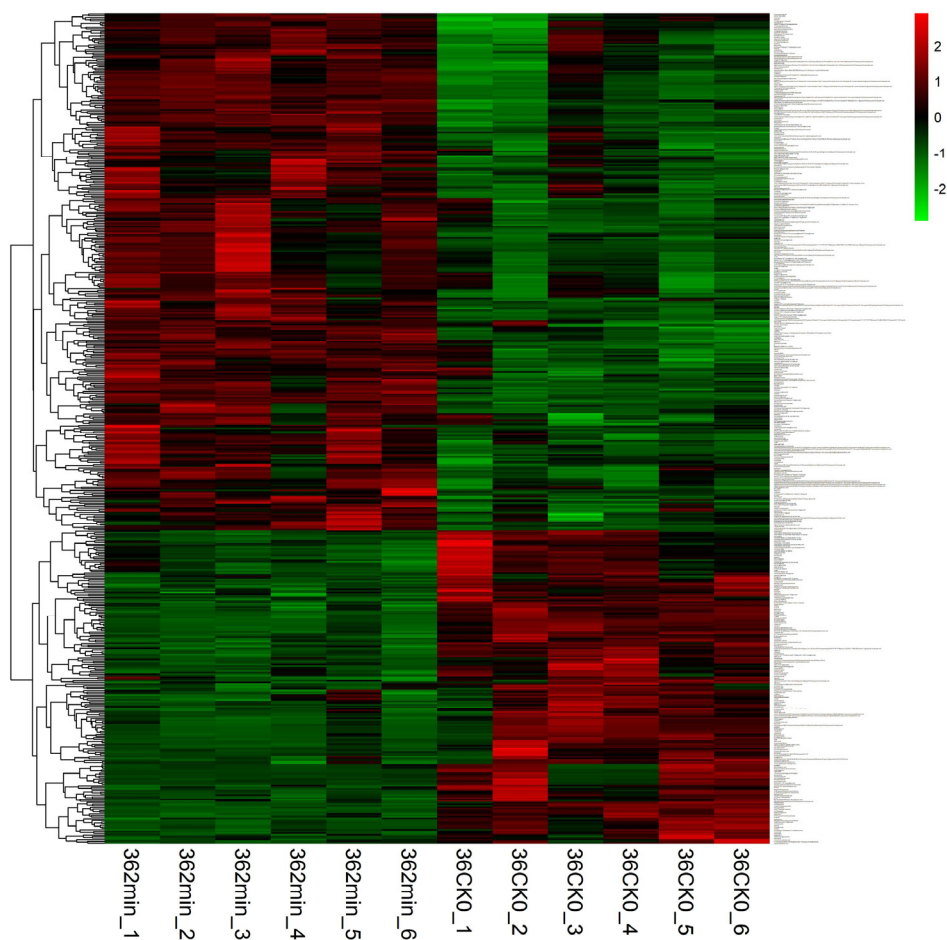

(i)

Figure S1: The differential metabolite heat maps of comparison groups. (a) F CK0/36 CK0 group; (b) F 2 min/36 2 min group; (c) F 15 min/36 15 min group; (d) F 15 min/F CK0 group; (e) F 15 min/F 2 min group; (f) F 2 min/F CK0 group; (g) 36 15 min/36 CK0; (h) 36 15 min/36 2 min; (i) 36 2 min/36 CK0.

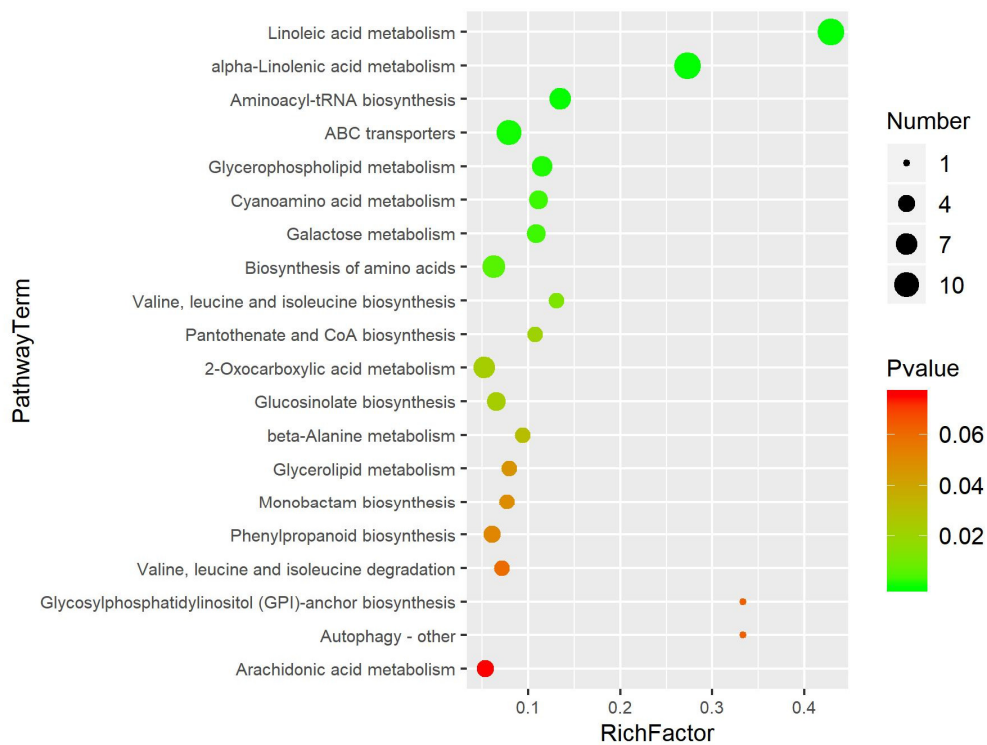

(a)

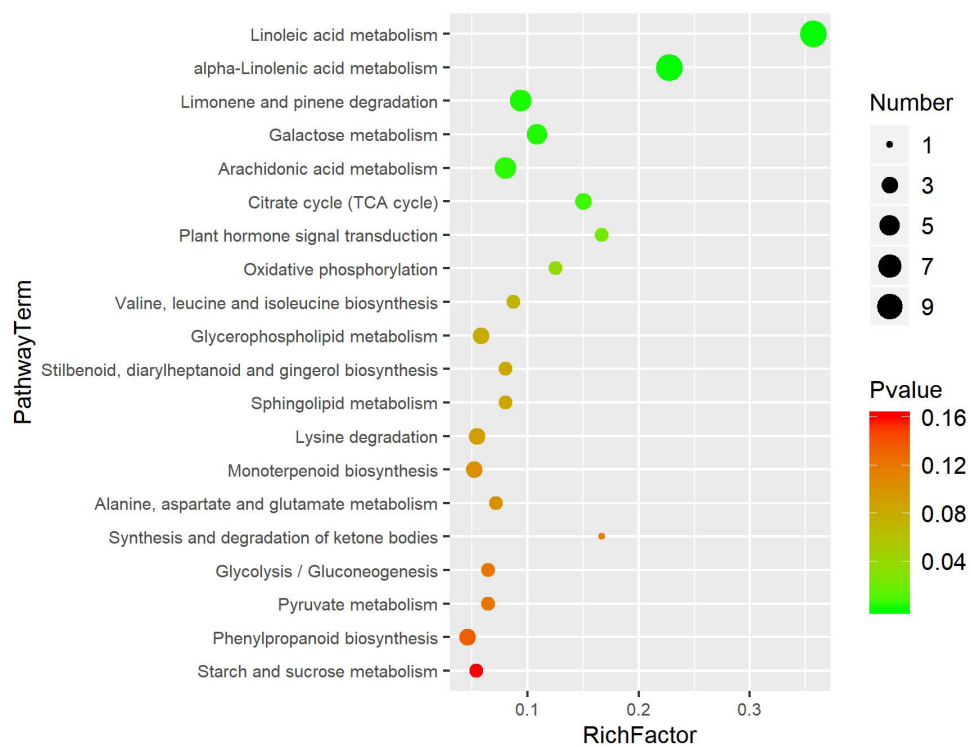

(b)

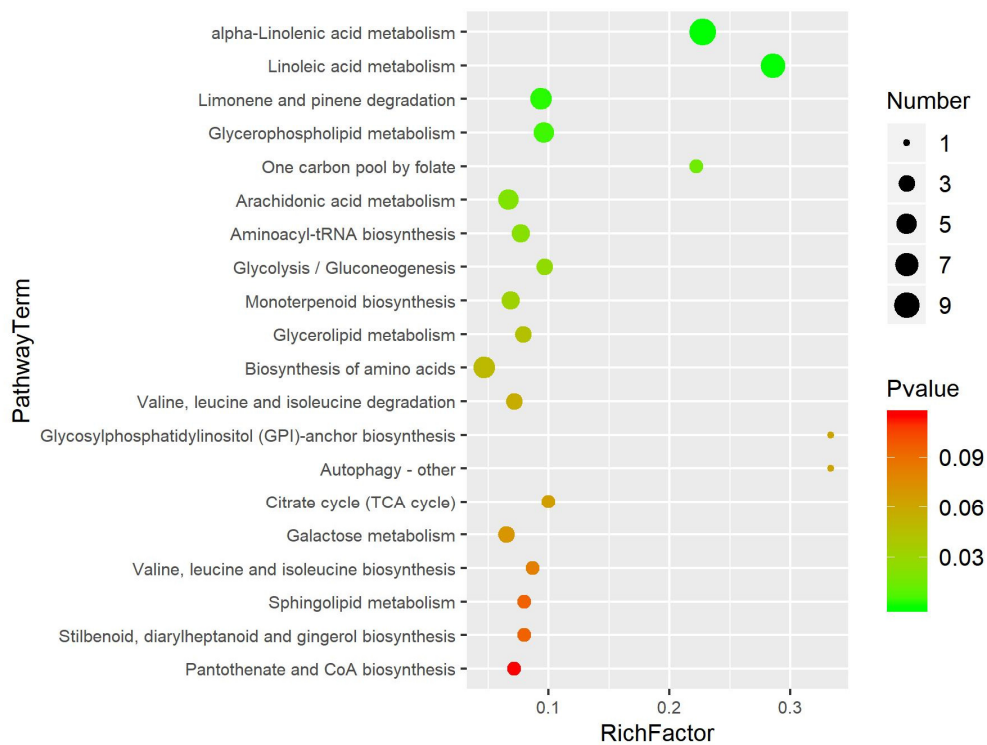

(c)

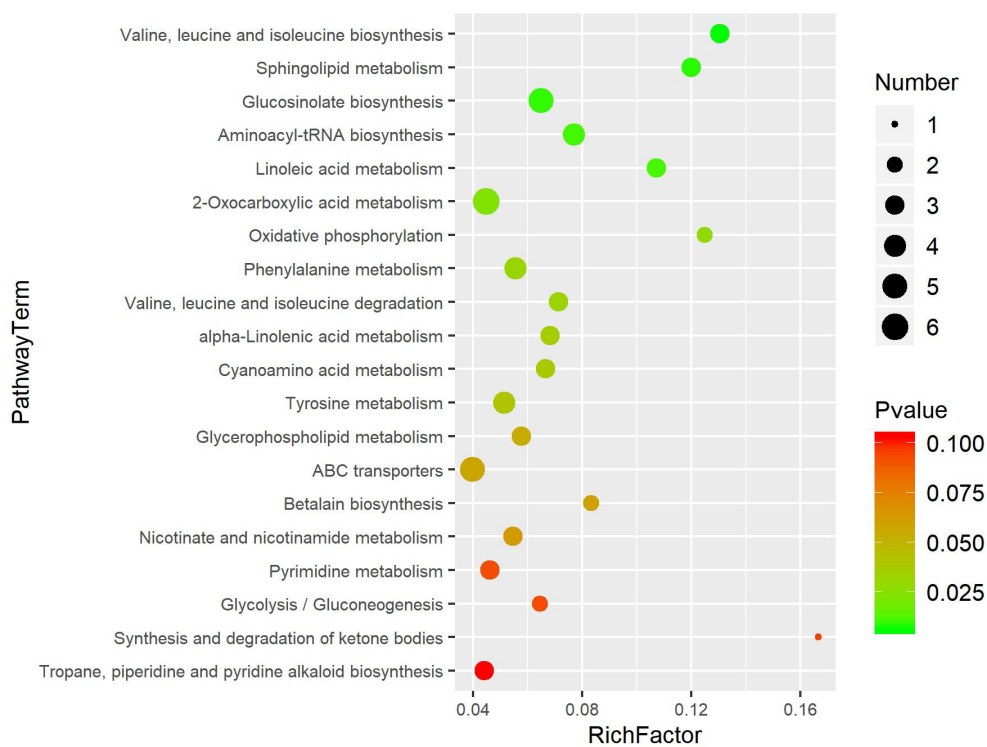

(d)

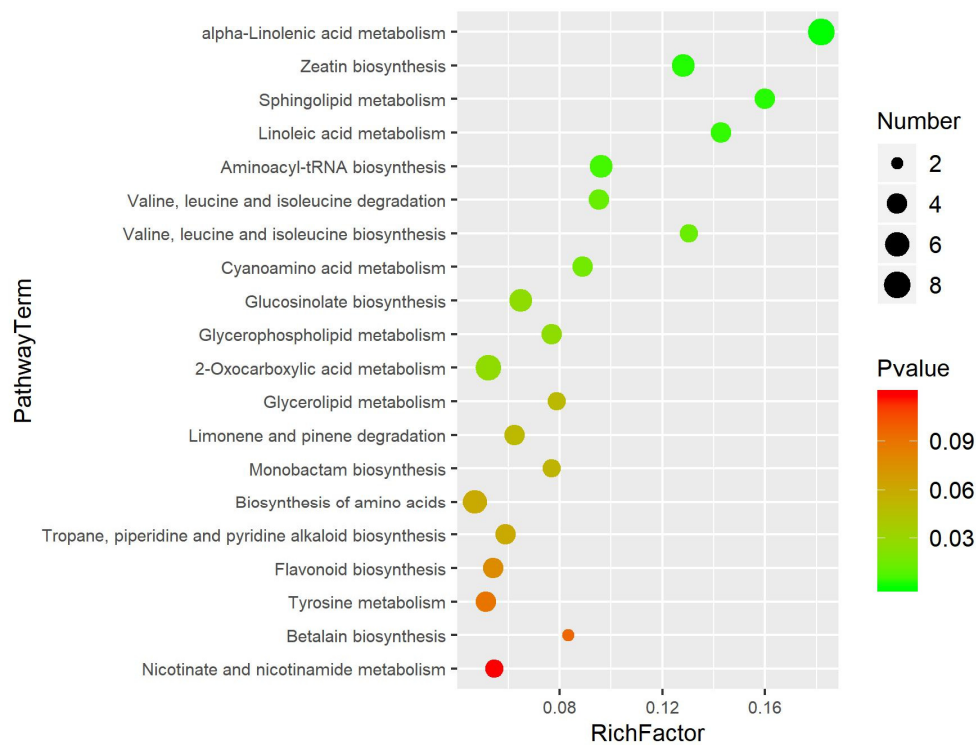

(e)

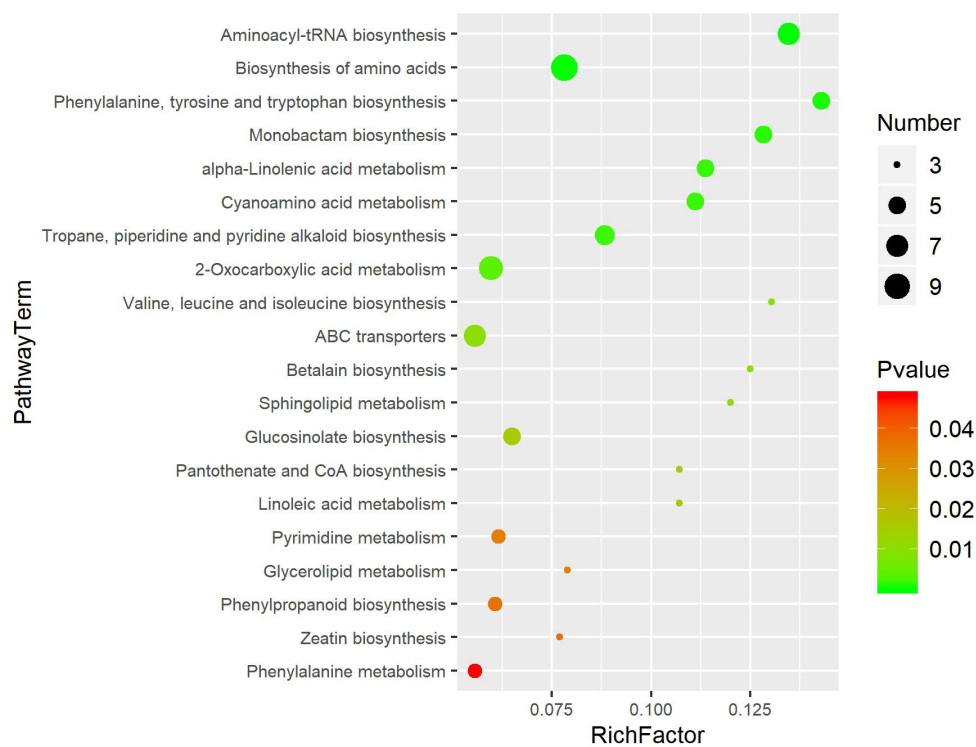

(f)

Figure S2: The differential metabolite bubble maps of comparison groups. (a) F 15 min/F CK0 group; (b) F 15 min/F 2 min, group. (c) F 2 min/F CK0 group; (d) 36 15 min/36 CK0; (e) 36 15 min/36 2 min; (f) 36 2 min/36 CK0.
